# Supplementary material for: Phenolic Contents and Antioxidant Activity of Citrullus colocynthis Fruits, Growing in the Hot Arid Desert of the UAE, Influenced by the Fruit Parts, Accessions, and Seasons of Fruit Collection
Source: MDPI journal article supplement (doi:10.3390/antiox11040656), 2022-03-29
Supplement: s1 [file s1]

## Supplementary Table S1

Monthly variation in temperature and atmospheric humidity in Sharjah Airport, a few Kilometers away from the study site.

| Climatic variable   |         | Oct. 20 | Nov. 20 | Dec. 20 | Jan. 21 | Feb. 21 | Mar. 21 | Apr. 21 | May. 21 | Jun. 21 | Jul. 21 | Aug. 21 | Sep. 21 |
|---------------------|---------|---------|---------|---------|---------|---------|---------|---------|---------|---------|---------|---------|---------|
| Temperature<br>(°C) | Maximum | 42      | 36      | 33      | 28      | 33      | 39      | 41      | 45      | 46      | 45      | 46      | 43      |
|                     | Minimum | 18      | 17      | 12      | 7       | 12      | 12      | 17      | 22      | 26      | 28      | 29      | 26      |
|                     | Average | 30      | 27      | 23      | 19      | 21      | 25      | 29      | 32      | 35      | 37      | 36      | 34      |
| Humidity (%)        | Maximum | 89      | 88      | 88      | 100     | 100     | 94      | 100     | 89      | 94      | 79      | 89      | 94      |
|                     | Minimum | 3       | 21      | 18      | 11      | 12      | 6       | 6       | 3       | 7       | 11      | 6       | 9       |
|                     | Average | 44      | 56      | 54      | 56      | 65      | 47      | 42      | 46      | 47      | 43      | 49      | 54      |

## Supplementary Table S2.

The relative % of metabolites detected in *C. colocynthis* fruits collected in Summer (Red Bold) and Winter (Blue) seasons, from the GC-MS profile results with an antioxidant activity. The analysed part (R: rind, P: pulp, S: seed). The accession number (6, 10, 13).

| Compound                     | Class                                        | References                                                                                                                                | Summer & Winter   |                  |                  |                     |                     |                  |                    |           |                  |
|------------------------------|----------------------------------------------|-------------------------------------------------------------------------------------------------------------------------------------------|-------------------|------------------|------------------|---------------------|---------------------|------------------|--------------------|-----------|------------------|
|                              |                                              |                                                                                                                                           | A6                |                  |                  | A10                 |                     |                  | A13                |           |                  |
|                              |                                              |                                                                                                                                           | R                 | P                | S                | R                   | P                   | S                | R                  | P         | S                |
| <b>α -Linolenic acid</b>     | Fatty acid                                   | (Wang et al., 2007)                                                                                                                       | <b>11.21</b><br>- | -<br>2.4         | -<br>-           | -<br>-              | -<br>-              | -<br>-           | -<br>12.18         | -<br>3.37 | -<br>-           |
| <b>β -Alanine</b>            | Amino acid                                   | (Zhao et al., 2016)                                                                                                                       | <b>0.19</b><br>-  | -<br>-           | <b>0.41</b><br>- | <b>0.46</b><br>-    | <b>0.15</b><br>0.23 | <b>0.68</b><br>- | <b>0.7</b><br>-    | -<br>-    | <b>0.44</b><br>- |
| <b>β -D-(+)-Talopyranose</b> | Aldohexose sugar                             | (Chandra et al., 2021)                                                                                                                    | <b>0.5</b><br>-   | -<br>-           | -<br>-           | -<br>-              | -<br>-              | -<br>-           | -<br>-             | -<br>-    | -<br>-           |
| <b>β -D-Allopyranose</b>     | Aldohexose sugar                             | ( <a href="https://www.ebi.ac.uk/chebi/searchId.do?chebiId=CHEBI:40656">https://www.ebi.ac.uk/chebi/searchId.do?chebiId=CHEBI:40656</a> ) | <b>25.58</b><br>- | -<br>17.76       | -<br>-           | -<br>-              | -<br>-              | -<br>-           | <b>36.36</b><br>10 | -<br>-    | -<br>-           |
| <b>β -D-Galactofuranose</b>  | polysaccharides                              | (Hammami et al., 2018)                                                                                                                    | -<br>-            | -<br>-           | <b>0.14</b><br>- | -<br>-              | -<br>-              | -<br>-           | -<br>-             | -<br>-    | <b>0.13</b><br>- |
| <b>β -Sitosterol</b>         | Phytosterol                                  | ( <a href="https://www.ebi.ac.uk/chebi/searchId.do?chebiId=CHEBI:27693">https://www.ebi.ac.uk/chebi/searchId.do?chebiId=CHEBI:27693</a> ) | -<br>-            | -<br>-           | -<br>-           | <b>11.94</b><br>-   | -<br>-              | -<br>-           | -<br>-             | -<br>-    | -<br>-           |
| <b>β -Tocopherol</b>         | Fat-soluble vitamin E,<br>methylated phenols | (Burcova et al., 2019)                                                                                                                    | <b>0.09</b><br>-  | -<br>-           | <b>3.75</b><br>- | <b>0.62</b><br>-    | -<br>-              | <b>2.29</b><br>- | -<br>-             | -<br>-    | <b>2.03</b><br>- |
| <b>1-Decanol, 2-hexyl-</b>   | fatty alcohol                                | (Martínez et al., 2009)                                                                                                                   | -<br>2.54         | <b>6.07</b><br>- | <b>2.55</b><br>- | <b>0.52</b><br>1.91 | -<br>0.46           | <b>2.42</b><br>- | <b>1.4</b><br>0.03 | -<br>-    | <b>2.33</b><br>- |
| <b>1-Monolinolein</b>        | Monoglyceride                                | (Quijano-Avilés et al., 2021)                                                                                                             | <b>0.95</b><br>-  | -<br>-           | -<br>-           | -<br>-              | -<br>-              | -<br>-           | -<br>-             | -<br>-    | -<br>-           |
| <b>1-Octacosanol</b>         | Fatty alcohol                                | (Sengupta et al., 2018)                                                                                                                   | -<br>24.67        | -<br>-           | -<br>-           | -<br>0.42           | -<br>0.05           | -<br>-           | -<br>0.8           | -<br>-    | -<br>-           |

|                                  |                                 |                                                                                                                                           |            |              |           |            |                |           |                |               |           |
|----------------------------------|---------------------------------|-------------------------------------------------------------------------------------------------------------------------------------------|------------|--------------|-----------|------------|----------------|-----------|----------------|---------------|-----------|
| <b>2-Methyltetracosane</b>       | Fatty Acyls (Hydrocarbon)       | (Ramya et al., 2015)                                                                                                                      | -<br>-     | -<br>-       | -<br>-    | -<br>-     | -<br>-         | -<br>-    | 0.7<br>-       | 0.17<br>-     | -<br>-    |
| <b>2-Methyl-3-pentanol</b>       | Fatty alcohol                   | (Ahmed et al., 2019)                                                                                                                      | -<br>-     | -<br>-       | 0.72<br>- | -<br>-     | -<br>-         | 0.22<br>- | -<br>-         | -<br>-        | 0.44<br>- |
| <b>2-Oleoylglycerol</b>          | Monoradylglycerols              | (Wang et al., 2014)                                                                                                                       | -<br>2.54  | 86.4<br>-    | -<br>-    | -<br>-     | 4.11<br>-      | -<br>-    | -<br>-         | 2.84<br>-     | -<br>-    |
| <b>4-Coumaric acid</b>           | Phenolic acid / Carboxylic acid | (Ilavenil et al., 2016)                                                                                                                   | 0.25<br>-  | 4.49<br>0.08 | -<br>-    | -<br>-     | 0.22<br>0.15   | -<br>-    | -<br>-         | 0.73<br>-     | -<br>-    |
| <b>9,12-Octadecadienoic acid</b> | Fatty acid methyl ester         | (Pinto et al., 2017)                                                                                                                      | 0.18<br>-  | -<br>-       | -<br>-    | 4.99<br>-  | -<br>-         | -<br>-    | -<br>-         | -<br>-        | -<br>-    |
| <b>Aucubin</b>                   | Iridoid o-glycosides            | ( <a href="https://www.medchemexpress.com/Aucubin.html">https://www.medchemexpress.com/Aucubin.html</a> )                                 | -<br>59.33 | 3.04<br>-    | -<br>-    | 11.32<br>- | -<br>-         | -<br>-    | -<br>2.29      | 3.34<br>0.09  | -<br>-    |
| <b>Butanoic acid</b>             | Fatty acid                      | (Kumar et al., 2010)                                                                                                                      | -<br>-     | -<br>-       | -<br>-    | 0.46<br>-  | -<br>-         | -<br>-    | -<br>-         | -<br>-        | -<br>-    |
| <b>Butylated hydroxytoluene</b>  | Methyl phenol                   | (Iverson 1995)                                                                                                                            | 19.25<br>- | -<br>23.07   | -<br>-    | 18.97<br>- | 69.67<br>45.76 | -<br>-    | -<br>32.35     | 92.2<br>28.73 | -<br>-    |
| <b>Citric acid</b>               | Organic acid                    | (Ryan et al., 2019)                                                                                                                       | -<br>-     | -<br>-       | 0.38<br>- | -<br>0.38  | 16.42<br>3     | 0.13<br>- | 30.87<br>-     | -<br>37.16    | 0.4<br>-  |
| <b>Citrulline</b>                | Amino acid                      | (Ahmadi et al., 2020)                                                                                                                     | -<br>-     | -<br>1       | -<br>-    | -<br>-     | 3.57<br>-      | -<br>-    | 4.67<br>-      | -<br>-        | -<br>-    |
| <b>D-Psicopyranose</b>           | Hexose                          | ( <a href="https://www.ebi.ac.uk/chebi/searchId.do?chebiId=CHEBI:27605">https://www.ebi.ac.uk/chebi/searchId.do?chebiId=CHEBI:27605</a> ) | 2.23<br>-  | -<br>-       | -<br>-    | -<br>-     | -<br>-         | -<br>-    | -<br>-         | -<br>-        | -<br>-    |
| <b>Disiloxane, hexamethyl-</b>   | Fatty Acyls (Hydrocarbon)       | (Otify et al., 2019)                                                                                                                      | -<br>-     | -<br>-       | -<br>-    | -<br>-     | -<br>-         | -<br>-    | -<br>-         | -<br>-        | 0.13<br>- |
| <b>Erythritol</b>                | Sugar alcohol                   | (Den Hartog et al., 2010)                                                                                                                 | -<br>5.84  | -<br>23.37   | -<br>-    | -<br>-     | 4.99<br>-      | -<br>-    | 11.03<br>10.66 | -<br>-        | -<br>-    |
| <b>Ferulic acid</b>              | Hydroxycinnamic acid            | (Hussain et al., 2013)                                                                                                                    | 0.15       | -            | -         | -          | -              | -         | -              | -             | -         |

|                       |            |                             |       |       |       |       |       |       |       |       |       |   |
|-----------------------|------------|-----------------------------|-------|-------|-------|-------|-------|-------|-------|-------|-------|---|
|                       |            |                             | -     | -     | -     | -     | -     | -     | -     | -     | -     | - |
| <b>Myristic acid</b>  | Fatty acid | (Gurudeeban et al., 2010)   | 0.49  | -     | 2.42  | 7.41  | 0.87  | 2.62  | 11.7  | 0.73  | 2.69  |   |
|                       |            |                             | -     | -     | 0.35  | 0.71  | -     | 0.44  | -     | -     | 0.38  |   |
| <b>Oleic acid</b>     | Fatty acid | (Terés et al., 2008)        | -     | -     | -     | -     | -     | -     | 2.57  | -     | -     |   |
|                       |            |                             | 2.03  | -     | -     | -     | -     | -     | 0.03  | 0.1   | 0.35  |   |
| <b>Palmitic acid</b>  | Fatty acid | (Sawaya et al., 1983)       | 24.09 | -     | 33.83 | 28.38 | -     | 34.7  | -     | -     | 34.51 |   |
|                       |            |                             | -     | 22.66 | 33.61 | 34.89 | 32.62 | 31.21 | 18.85 | 22.86 | 32.49 |   |
| <b>Propionic acid</b> | Fatty acid | (Dionisi-Vici et al., 2006) | -     | -     | -     | -     | -     | -     | -     | -     | -     |   |
|                       |            |                             | 3.05  | -     | -     | -     | -     | -     | -     | -     | -     |   |
| <b>Stearic acid</b>   | Fatty acid | (Sadou et al., 2007)        | 14.83 | -     | 55.8  | 14.95 | -     | 56.93 | -     | -     | 56.9  |   |
|                       |            |                             | -     | 9.66  | 66.04 | 61.68 | 17.73 | 68.34 | 12.8  | 7.68  | 66.77 |   |
